# Supplementary material
Source: PubMed Central journal article supplement (PMC7137770)
Supplement: jgv-100-1680-s001.pdf [file jgv-100-1680-s001.pdf]

1 **A Novel Murine Model of Differentiation-mediated Cytomegalovirus Reactivation from**  
2 **Latently Infected Bone Marrow Hematopoietic Cells**

3 Xue-feng Liu<sup>1</sup>, Suchitra Swaminathan<sup>2</sup>, Shixian Yan<sup>1</sup>, Flora Anna Engelmann<sup>1</sup>, Darryl Adelaide  
4 Abbott<sup>2</sup>, Longhui Qiu<sup>1</sup>, Qing Chen<sup>4</sup>, Andre Iovane<sup>1</sup>, Luke Andrew VanOsdol<sup>1</sup>, Zheng Zhang<sup>1</sup>, and  
5 Michael M. Abecassis<sup>1, 3\*</sup>

6

7 <sup>1</sup>Comprehensive Transplant Center, Departments of Surgery, Northwestern University Feinberg  
8 School of Medicine, Chicago, IL, USA

9 <sup>2</sup> Department of Medicine, Division of Rheumatology, Northwestern University Feinberg School  
10 of Medicine, Chicago, IL, USA

11 <sup>3</sup> Department of Microbiology and Immunology, Northwestern University Feinberg School of  
12 Medicine, Chicago, IL, USA

13 <sup>4</sup> Department of Pathology, Northwestern University Feinberg School of Medicine, Chicago, IL,  
14 USA

15

16

17

**SUPPORTING DATA**

18

19

20

21

22

23

24

25 **Table S1. Antibody panels for Immunophenotyping of M-CSF or GM-CSF differentiated BMCs**

| Fluorophores        | Panel1<br>Myeloid and<br>maturation markers | Panel2<br>Macrophages | Panel3<br>Dendritic cells(DCs) |
|---------------------|---------------------------------------------|-----------------------|--------------------------------|
| FITC                | CD40                                        |                       | CD24                           |
| PerCP-Cy5.5         | MHCII                                       | MHCII                 | MHCII                          |
| V500                | FVD eFluor® 506                             | FVD eFluor® 506       | FVD eFluor® 506                |
| E450/BV421          | CD115                                       | CD135                 | mPDCA1                         |
| APC                 | CD86                                        | CD11c                 |                                |
| AF700               | CD45                                        | CD45                  | CD45                           |
| APC-Cy7             | CD11b                                       | CD11b                 |                                |
| PE                  | CD64                                        | CD115                 |                                |
| PE-CF594 (PE TxRed) | CD80                                        |                       | Lymph Dump                     |
| PE-Cy7              | CD11c                                       | MerK                  | CD11c                          |
| BUV395              | F4/80                                       |                       | CD11b                          |

26  
27  
28  
29  
30  
31  
32  
33  
34  
35  
36  
37  
38  
39  
40  
41  
42

49 **Table S2. Antibody panels for bone marrow cells sorting**

| <b>Fluorophores</b> | <b>Panel1,<br/>Lymphocytes</b> | <b>Panels,<br/>CD11b positive<br/>cells</b> | <b>Panel3<br/>Stem cells and<br/>progenitor cells</b>            |
|---------------------|--------------------------------|---------------------------------------------|------------------------------------------------------------------|
| BUV395              | LD Blue                        | LD Blue                                     | LD Blue                                                          |
| BV421               | CD3e                           | CD115                                       | CD135                                                            |
| BV510               |                                |                                             | CD127                                                            |
| FITC                | CD3+CD19+CD49b                 | CD3+CD19+CD49b                              | CD3+CD19+CD49b                                                   |
| PerCP5.5            | CD335 (NKp46)                  | Ly6G                                        | Lin (Ter119, CD11c, CD3e,<br>CD11b, Ly6G, CD335, CD19,<br>MHCII) |
| PE                  |                                | CD11c                                       | CD45                                                             |
| PE TxRed            | CD19 or B220                   | Siglec F                                    | CD117                                                            |
| PC7                 |                                | F4/80                                       | CD244                                                            |
| APC                 |                                | mPDCA1                                      | CD150                                                            |
| A700                | CD11b                          | CD11b                                       |                                                                  |
| AC7                 |                                | Ly6C                                        | CD48                                                             |

50

51

52

53

54

55

56

57

58

59

43 **Table S3. Antibodies used for Immunophenotyping of differentiated BMCs.**

| Antigen and Fluorophores                      | Clone        | Vendor and catalog #          | Volume/100ul |
|-----------------------------------------------|--------------|-------------------------------|--------------|
| <b>Panel1, Myeloid and maturation markers</b> |              |                               |              |
| CD40-FITC                                     |              | Biologend, 124607             |              |
| I-A/I-E-PerCP-Cy5.5                           | M5/114.15.2  | BD Biosciences, 562363        | 0.5          |
| CD115-BV421                                   | AFS98        | Biologend, 135513             | 2ul          |
| CD86-APC                                      | GL1          | BD Biosciences, 561964        | 0.2ul        |
| CD45- AlexaFluor700                           | 30-F11       | BD Biosciences, 560510        | 0.3ul        |
| CD11b-APC-Cy7                                 | M1/70        | BD Biosciences, 557657        | 0.15ul       |
| CD64-PE                                       | X54-5/7.1    | BD Biosciences, 558455        | 0.3ul        |
| CD80-PE-CF594                                 | 16-10A1      | BD Biosciences, 562504        | 0.5ul        |
| CD11c-PE-Cy7                                  | HL3          | BD Biosciences, 558079        | 0.2ul        |
| F4/80-BUV395                                  | T45-2342     | BD Biosciences, 565614        | 0.3ul        |
| <b>Panel2, Macrophages</b>                    |              |                               |              |
| MHCII-PerCP-Cy5.5                             | M5/114.15.2  | BD Biosciences, 562363        | 0.5          |
| CD135-BV421                                   | A2F10.1      | BD Biosciences, 562898        | 2ul          |
| CD11c-APC                                     | N418         | eBioscience, 17-0114-82       | 0.5ul        |
| CD45- AlexaFluor700                           | 30-F11       | BD Biosciences, 560510        | 0.3ul        |
| CD11b-APC-Cy7                                 | M1/70        | BD Biosciences, 557657        | 0.2ul        |
| CD115-PE                                      | T38-320      | BD Biosciences, 565249        | 0.5ul        |
| MerTK-PE-Cy7                                  | DS5MMER      | ThermoFisher, 25-5751         | 0.3ul        |
| <b>Lymph Dump for Panel3</b>                  |              |                               |              |
| NK1.1-PE-CF594                                | PK136        | BD Biosciences, 562864        | 0.3ul        |
| CD3e-PE-CF594                                 | 145-2C11     | BD Biosciences, 562332        | 0.6ul        |
| CD19-PE-CF594                                 | ID3          | BD Biosciences, 562291        | 0.6ul        |
| Ly6G-PE-CF594                                 | 1A8          | BD Biosciences, 562700        | 0.3ul        |
| SiglecF-PE-CF594                              | E50-2440     | BD Biosciences, 562757        | 0.15ul       |
| <b>Panel3, Dendritic cells</b>                |              |                               |              |
| CD24-FITC                                     | M1/69        | BD Biosciences, 561777        | 2ul          |
| MHCII-PerCP-Cy5.5                             | M5/114.15.2  | BD Biosciences, 562363        | 0.5          |
| mPDCA1-APC                                    | JF05-1C2.4.1 | Miltenyi BioTech, 130-102-829 | 1ul          |
| Lymph Dump (See above)                        |              |                               | 1.95ul       |
| CD11c-PE-Cy7                                  | N418         | ThermoFisher, 25-0114-82      | 0.3ul        |
| CD11b-BUV395                                  | M1/70        | BD Bioscience, 563553         | 0.3ul        |

44

45

46

47

48

60 **Table S4. List of antibodies used in BMC sorting.**

| Antibody                                                        | Clone         | Vendor and Catalog #         | Volume/<br>100ul |
|-----------------------------------------------------------------|---------------|------------------------------|------------------|
| <b>Panel1 for Lymphocytes (FITC positive cells)</b>             |               |                              |                  |
| CD3e-BV421                                                      | 145-2C11      | BD Biosciences, 562600       | 0.5ul            |
| CD19-PE-CF594                                                   | ID3           | BD Biosciences, 562291       | 0.6ul            |
| CD335(NKp46)-PerCP                                              | 29A1.4        | eBioscience, 46-3351         | 0.5ul            |
| CD11b-AlexaFluor700                                             | M1/70         | eBioscience, 56-0112-80      | 0.2ul            |
| <b>Panel2 for CD11b positive cells</b>                          |               |                              |                  |
| CD115-BV421                                                     | AFS98         | Biolegend, 135513            | 2ul              |
| Ly6G-PerCP-Cy5.5                                                | IA8-Ly6G      | eBioscience, 46-9668-82      | 0.5ul            |
| CD11c-PE                                                        | N418          | eBioscience, 12-0114-81      | 0.5ul            |
| SiglecF-PE-CF594                                                | E50-2440      | BD Biosciences, 562757       | 0.2ul            |
| F4/80-PE-Cy7                                                    | BM8           | Biolegend, 123114            | 0.3ul            |
| CD11b-AlexaFluor700                                             | M1/70         | eBioscience, 56-0112-80      | 0.2ul            |
| Ly6C-APC-Cy7                                                    | AL-21         | BD Biosciences, 560596       | 0.5ul            |
| mPDCA1-APC                                                      | JF05-1C2.4.1  | Miltenyi Biotec, 130-102-829 | 1ul              |
| <b>Panel3 for HSPCs ( FITC and CD11b double negative cells)</b> |               |                              |                  |
| CD135-BV421                                                     | A2F10.1       | BD Biosciences, 562898       | 2ul              |
| CD127-BV510                                                     | A7R34         | Biolegend, 135033            | 1.2ul            |
| CD45-PE                                                         | 30-F11        | Biolegend, 103106            | 0.5ul            |
| CD117-PE-CF594                                                  | 2B8           | BD Biosciences, 562417       | 0.5ul            |
| CD244.2-PE-Cy7                                                  | M2B4(B6)458.1 | Biolegend, 133512            | 1.2ul            |
| CD150-APC                                                       | TC15-12       | Biolegend, 115909            | 0.6ul            |
| CD48-APC-Cy7                                                    | HM48          | Biolegend, 103432            | 1ul              |
| CD11b-AlexaFluor700                                             | M1/70         | eBioscience, 56-0112-80      | 0.2ul            |
| Lineage markers-PerCP-Cy5.5                                     | See below     |                              | 4.0ul            |
| <b>Lineage Markers Cocktail</b>                                 |               |                              |                  |
| TER119- PerCP-Cy5.5                                             | TER-119       | eBioscience, 45-5921         | 0.5ul            |
| CD11b-PerCP-CY5.5                                               | M1/70         | eBioscience, 45-0112-82      | 0.5ul            |
| CD11c-PerCP-Cy5.5                                               | N418          | eBioscience, 45-0114         | 0.5ul            |
| CD3e- PerCP-Cy5.5                                               | 145-2C11      | eBioscience, 45-0031         | 0.5ul            |
| Ly6G- PerCP-Cy5.5                                               | RB6-8C5       | eBioscience, 45-5931         | 0.5ul            |
| CD335-PerCP-eFluor710                                           | 29A1.4        | eBioscience, 46-3351         | 0.5ul            |
| CD19-PerCP-Cy5.5                                                | eBioD3        | eBioscience, 45-0193         | 0.5ul            |

|                     |             |                        |       |
|---------------------|-------------|------------------------|-------|
| I-A/I-E-PerCP-Cy5.5 | M5/114.14.2 | BD Biosciences, 562363 | 0.5ul |
|---------------------|-------------|------------------------|-------|

61  
62  
63  
64  
65  
66  
67  
68  
69  
70  
71  
72  
73  
74  
75  
76  
77  
78  
79  
80  
81  
82  
83  
84  
85  
86  
87  
88

89 Supplemental Figure 1

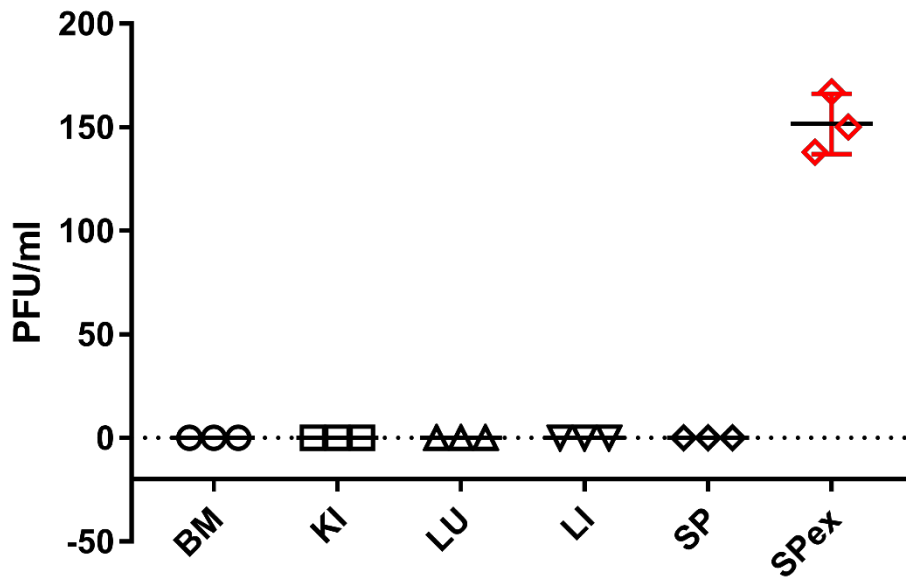

90

91 **Figure S1. Latency is established in BALB/c mice 3 months post infection (p.i.)**

92 Plaque assays were performed on mouse embryonic fibroblasts (MEFs) monolayer with the  
93 tissue lysate from the organs that were harvested from BALB/c mice 3months p.i. with Smith  
94 virus, and supernatant of explanted spleens from the same batch of mice. The data are  
95 presented as mean  $\pm$  SD of PFU per ml of homogenate or supernatant. N=3. BM, Bone marrow  
96 cells; KI, Kidneys; LU, lungs; LI, livers, SP, spleens; SPex, spleen tissues harvested from  
97 BALB/c 3 months p.i. were explanted (cultured) for 18 days.

98

99

100

101

102

103

104

105

106

107

108

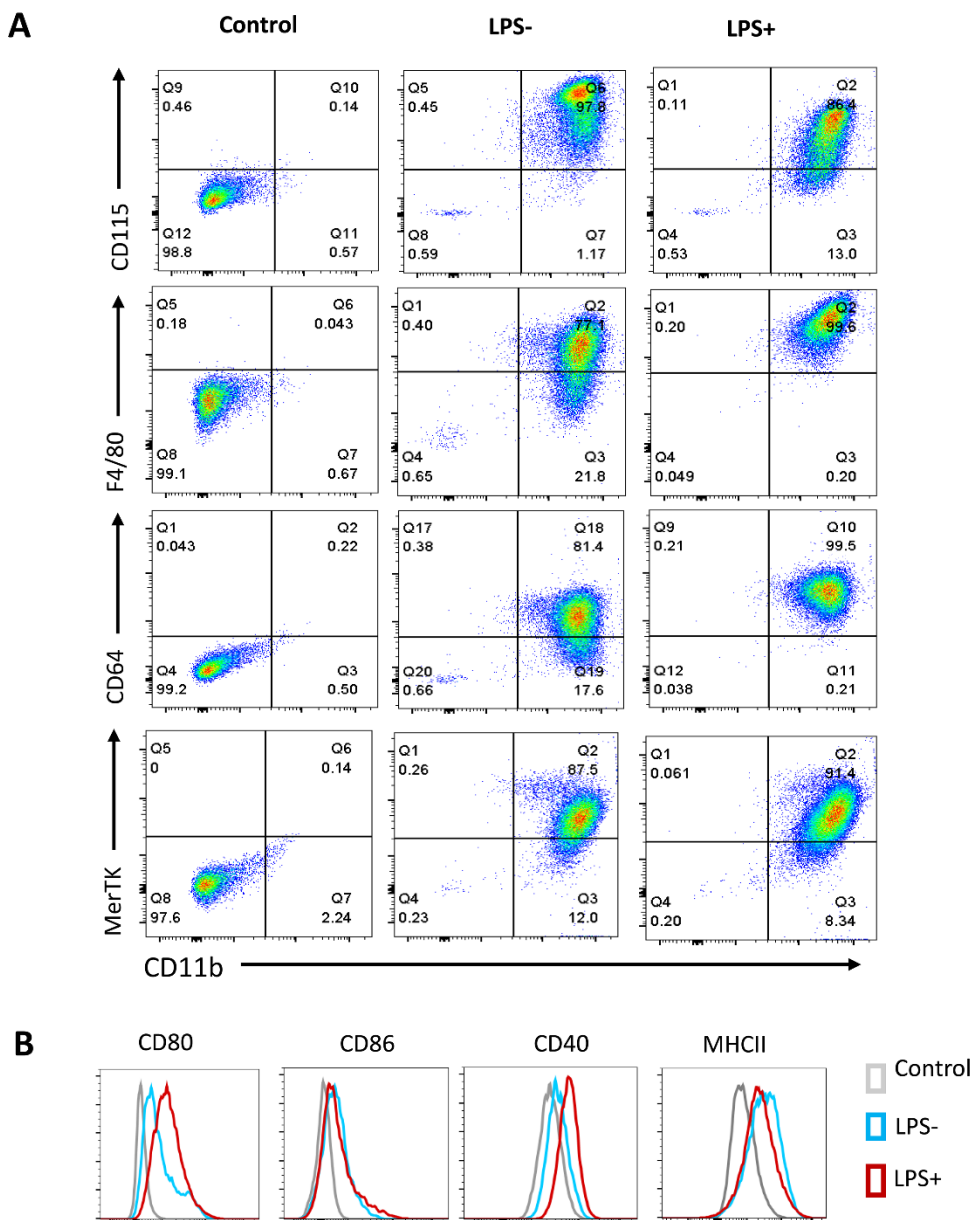

110

111 **Figure S2. Immunophenotype of M-CSF differentiated BMCs.**

112 **(A).** Phenotypes of representative M-CSF BMC culture in Day10 with or without LPS added in  
113 day9. The dot graphs show the surface marker expression on CD45+CD11b+ live cells.

114 **(B).** Maturation marker expression upon LPS treatment. The histograms show the indicated  
115 maturation marker expression in CD45+CD11b+F4/80+ cells.

116



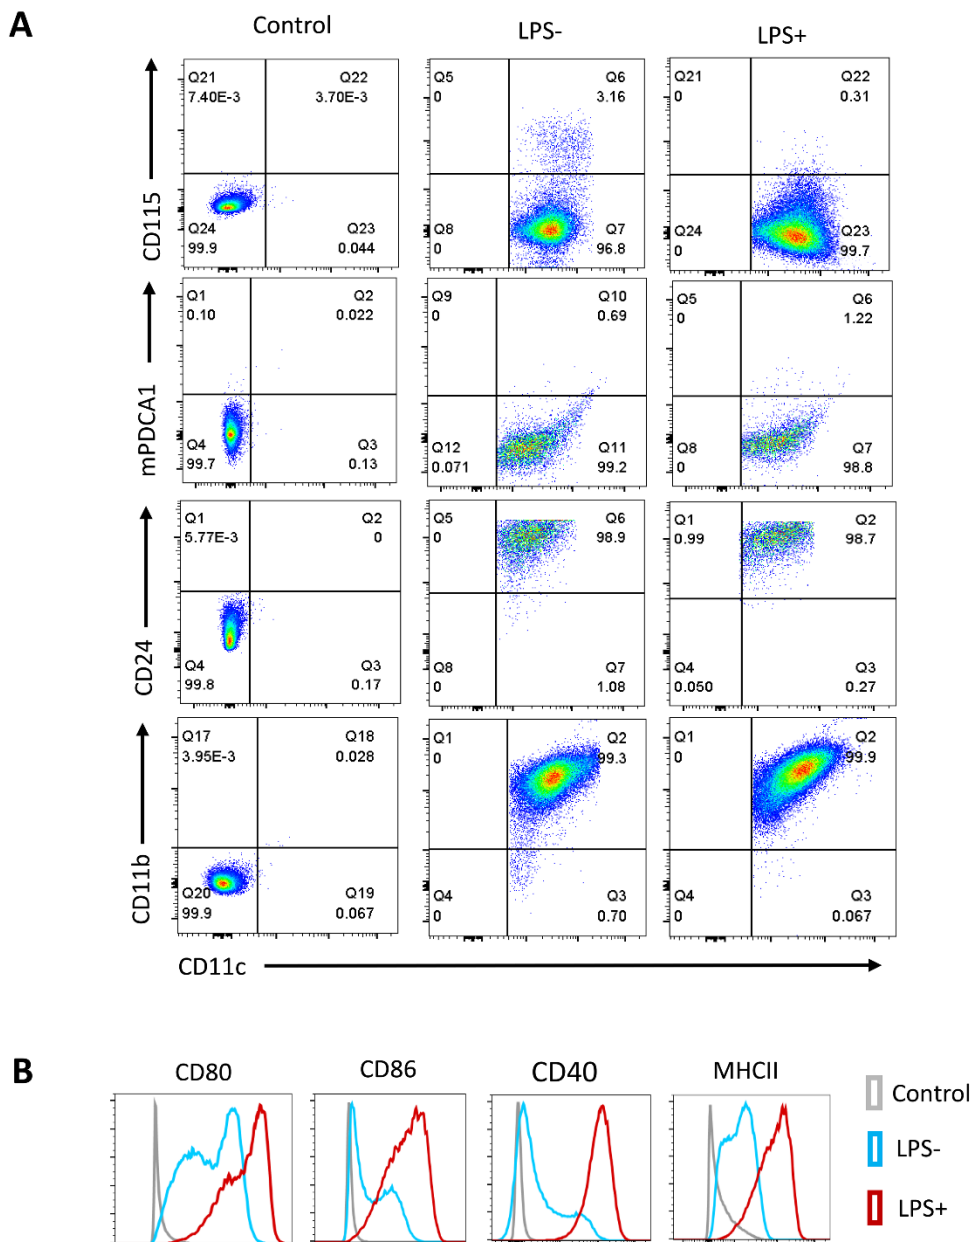

118  
 119 **Figure S3. Immunophenotype of GM-CSF/IL-4 differentiated BMCs.**  
 120 **(A).** Phenotype of representative GM-CSF/IL-4 BMC culture at day10 with or without LPS added  
 121 at day9. The dot graphs show the indicated surface marker expression in CD45+ Lymph Dump-  
 122 CD11c+ live cells.

123 **(B).** Maturation marker expression following LPS treatment. The histograms show the indicated  
 124 maturation marker expression in CD45+ Lymph Dump-CD11c+ cells.

126 **Supplemental figure 4**

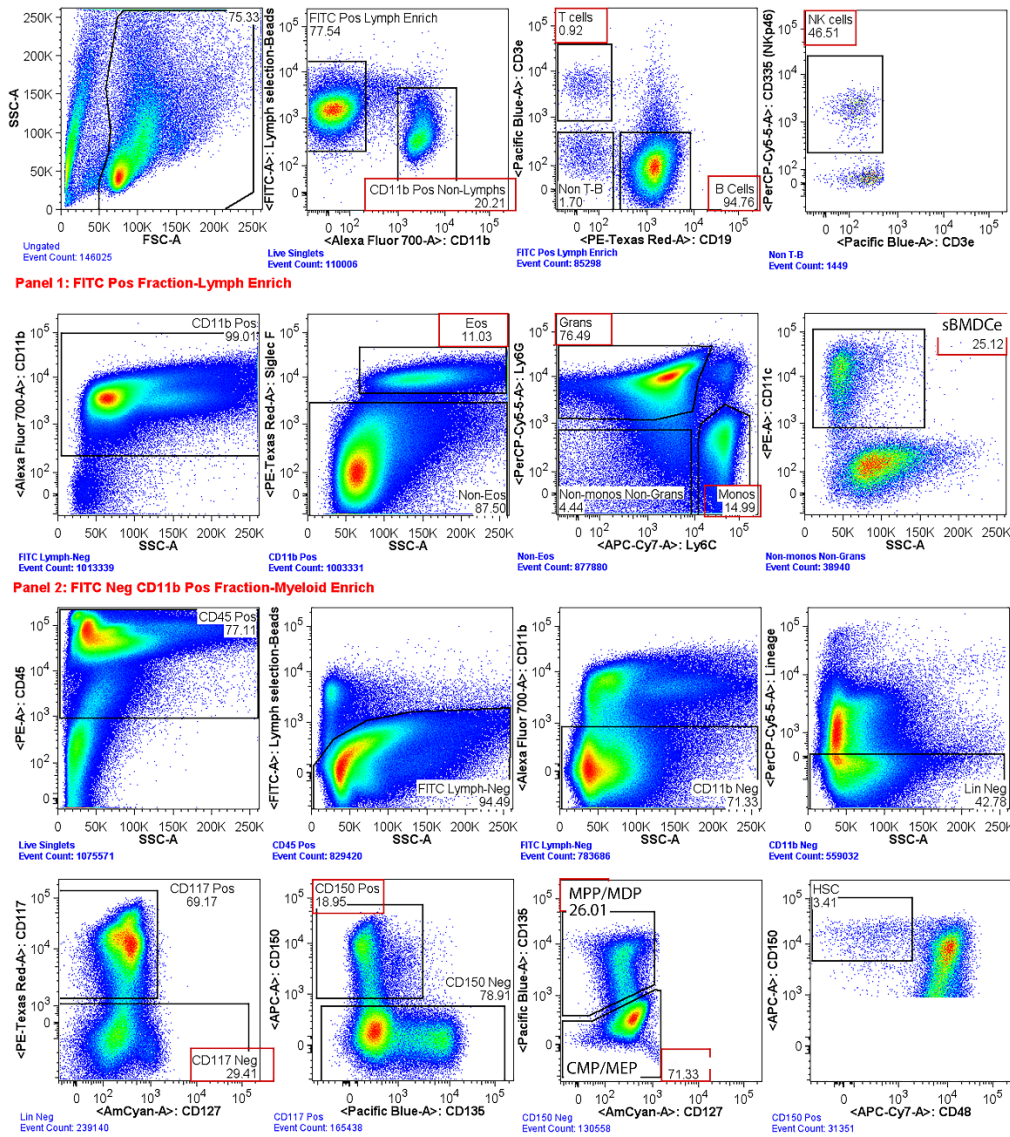

127 **Panel 3: FITC Neg CD11b Neg Fraction-Stem Enrich**  
 128 **Figure S4. Gating strategy FITC/CD11b selected BMCs.**

129 In **Panel 1**(top), three population of FITC+ CD11b- lymphoid cells were sorted and collected  
 130 including T-cells ( CD3e+CD19-), B-cells ( CD3e- CD19+), and NK cells ( CD3e- CD19- CD335+).  
 131 In **Panel 2** (middle), four populations of FITC- CD11b+ cells were sorted and collected, including  
 132 Eos (SiglecF+), Grans (SiglecF- Ly6G+), Monos (SiglecF- Ly6C+), and sBMDcE (SiglecF- Ly6G-  
 133 Ly6C- CD11c+). In **Panel3** (bottom), three populations of FITC- CD11b- CD45+ Lin- CD117+ cells  
 134 were sorted and collected, including HSC (CD150+CD135-CD48-), MPP/MDP/ (CD150- CD127-  
 135 CD135+), and CMP/MEP (CD150- CD127- CD135-). Abbreviation: Eos: Eosinophil; Grans:  
 136 granulocytes; Monos: Monocytes; sBMDcE: sorted bone-marrow dendritic cell-enriched fraction;  
 137 HSC: hematopoietic stem cells; CMP: common myeloid progenitor cells; MDP: macrophage-DC  
 138 progenitor; MEP: megakaryocytic-erythroid progenitors; MPP: multipotent progenitor cell.

140 **Supplemental figure 5**

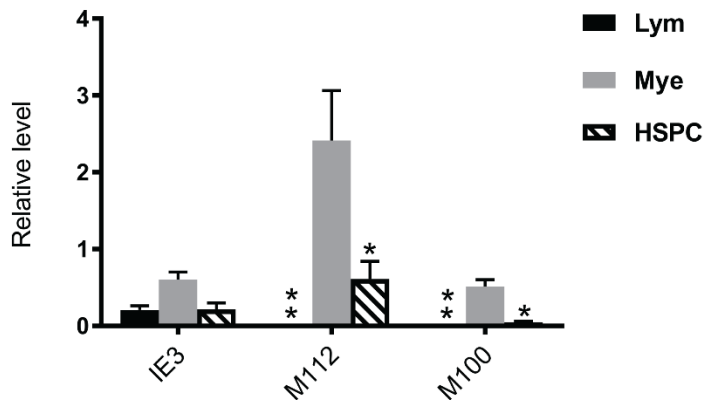

141

142 **Figure S5. MCMV RNA expression in different populations of BMCs 5 days p.i.**

143 BMCs from 5 BALB/c mice at 5 days p.i. with Smith virus were pooled and subjected to FITC bead  
144 separation, and CD11b positive bead separation successively resulting into three populations:  
145 FITC positive (lymphoid cells), FITC negative CD11b positive (Myeloid cells), and FITC negative  
146 CD11b negative (HSPCs). RNA extracted from these three populations of cells, was subjected  
147 to RT-qPCR with primers and probes specific to viral gene IE3, M112, and M100 respectively.  
148 Results are presented as the Mean  $\pm$  SD after normalization against cellular gene Eef2 RNA  
149 expression. N=4 for all populations of cells. Multiple individual student t tests were performed to  
150 determine the difference of viral gene expression in different populations of cells. \*P $\leq$  0.05; \*\*P $\leq$   
151 0.01. Lym: lymphoid cells; Mye: Myeloid cells; HSPC: hematopoietic stem cells and progenitor  
152 cells.

153
